# Supplementary material
Source: HighWire-hosted journal article supplement (http://www.qdcxjkg.com/highwire/filestream/113936/field_highwire_adjunct_files/0/ERJ-00019-2013_Disclosures.pdf)
Supplement: ERJ-00019-2013_Disclosures.pdf [file ERJ-00019-2013_Disclosures.pdf]

**J-W.C. Alffenaar** has received educational grants from Pfizer, MSD, and Schering-Plough for organising symposia on antifungal treatment. He has also received research funding from Pfizer. J-W.C. Alffenaar also received research funding from Astellas.
